# Supplementary material for: Modification of methane oxidation pathways during long-term incubations of methanic lake sediments
Source: Copernicus journal article supplement (doi:10.5194/bg-2021-223), 2021-08-24
Supplement: Supplementary file 1 [file bg-2021-223-supplement-version2.zip]

## Sheet: Sheet1
Pre-incubated slurry with hematite (411th day)	Pre-incubated slurry (bottle A, 541st day)	Pre-incubated slurry (bottle A, 362th day)	Pre-incubated slurry with hematite(t0)	Pre-incubated slurry (bottle B, 1227th day)	Semi-bioreactor with hematite (151st day) b	Semi-bioreactor with hematite (151st day) a	Semi-bioreactor with hematite (t0)	Incubation with freshly collected sediment (470th day)	Incubation with freshly collected sediment and amorphous iron (470th day)	Incubation with freshly collected sediment and hematite (470th day)
1	2	3	4	5	6	7	8	9	10	11	Taxonomy (GTDB)
9.51375	13.3178	8.30436	5.40143	17.7231	12.4856	12.6314	11.7707	6.1655	8.84629	9.41122	d__Archaea;p__Crenarchaeota;c__Bathyarchaeia;o__B26-1;f__UBA233;g__20-14-0-80-47-9;s
4.22997	4.06626	5.87844	2.40198	4.37341	2.88786	2.92626	3.1188	1.77691	3.71368	3.65247	d__Bacteria;p__Chloroflexota;c__Dehalococcoidia;o__GIF9;f__AB-539-J10;g__RBG-13-51-36;s
2.46377	1.95403	2.79041	3.46769	3.64051	2.96859	3.13833	3.62571	3.74119	3.30359	2.89429	d__Bacteria;p__Desulfobacterota;c__BSN033;o__BSN033;f__UBA1163;g__UBA1163;s
0.444448	0.74462	0.198972	2.6292	0.275837	3.49611	3.60392	3.13612	9.03983	4.27647	4.09552	d__Archaea;p__Euryarchaeota;c__Thermococci;o__Methanofastidiosales;f__;g__;s
2.42983	2.09313	2.41858	2.9324	2.8342	3.18061	3.26088	3.72856	2.649	2.37794	2.8943	d__Bacteria;p__Desulfobacterota;c__BSN033;o__BSN033;f__UBA1163;g__;s
2.80171	2.03025	2.79643	4.47146	1.80128	1.94463	1.95625	2.26538	2.47393	3.19639	3.2831	d__Archaea;p__Halobacterota;c__Methanomicrobia;o__Methanomicrobiales;f__Methanoregulaceae;g__UBA9949;s
1.95482	1.77543	1.95991	4.58732	1.1941	1.80877	1.90483	2.34213	3.80517	2.88771	2.60224	d__Bacteria;p__Nitrospirota;c__Thermodesulfovibrionia;o__Thermodesulfovibrionales;f__SM23-35;g__;s
2.50219	1.54373	2.34766	4.78087	1.0359	1.19981	1.23177	1.50201	2.8243	2.85742	2.77203	d__Archaea;p__Halobacterota;c__Methanomicrobia;o__Methanomicrobiales;f__Methanoregulaceae;g__Methanoregula;s
3.72264	2.45455	2.70522	1.33009	2.64589	1.34509	1.31893	1.86305	1.1067	1.74967	2.37889	d__Bacteria;p__Acidobacteriota;c__Aminicenantia;o__Aminicenantales;f__UBA4085;g__;s
1.67262	1.36817	1.74088	2.61446	1.51257	1.88956	1.89187	2.19928	1.98716	2.27939	2.14068	d__Bacteria;p__Desulfobacterota;c__Syntrophia;o__Syntrophales;f__UBA2192;g__;s
1.40656	4.26521	1.5181	0.146606	3.72353	1.66891	1.67414	1.51305	1.9346	1.46979	0.900641	d__Bacteria;p__Patescibacteria;c__Microgenomatia;o__GWA2-44-7;f__Woesebacteraceae;g__RBG-13-46-13;s
2.00803	1.22644	1.77437	2.0082	1.37292	1.21915	1.16654	1.47844	0.986027	1.90419	1.77273	d__Archaea;p__Halobacterota;c__Methanomicrobia;o__Methanomicrobiales;f__Methanoregulaceae;g__;s
1.09551	0.834889	1.50056	2.43879	1.08257	0.790281	0.835816	1.39837	1.81149	1.61452	1.71369	d__Archaea;p__Halobacterota;c__Methanosarcinia;o__Methanotrichales;f__Methanotrichaceae;g__;s
1.84013	1.0169	1.55437	2.94907	0.350512	0.478922	0.454259	0.721741	2.95391	1.27919	1.0923	d__Bacteria;p__Proteobacteria;c__Gammaproteobacteria;o__Betaproteobacteriales;f__Burkholderiaceae;g__GJ-E10;s
0.733587	0.991751	0.636205	1.36558	1.21753	1.52022	1.43958	1.94242	2.03281	1.30545	1.14359	d__Bacteria;p__MBNT15;c__MBNT15;o__MBNT15;f__MBNT15;g__;s
0.81471	1.22078	1.05907	1.02228	1.53448	1.34889	1.28921	1.67176	1.0352	1.52342	1.47161	d__Archaea;p__Halobacterota;c__Methanomicrobia;o__Methanomicrobiales;f__Methanofollaceae;g__;s
0.774961	0.830801	0.795506	1.67928	1.12179	1.57127	1.5491	2.55781	1.2463	0.859601	0.652233	d__Bacteria;p__Proteobacteria;c__Gammaproteobacteria;o__Betaproteobacteriales;f__Rhodocyclaceae;g__CG2-30-68-42;s
1.62884	1.22659	1.33594	0.90438	1.91898	1.38316	1.43133	1.5975	0.935557	0.394902	0.317827	d__Archaea;p__Thermoplasmatota;c__E2;o__DHVEG-1;f__DHVEG-1;g__;s
1.40338	1.92779	1.47893	1.13069	0.989235	0.777124	0.800831	0.981275	1.62321	0.961322	0.948353	d__Bacteria;p__Acidobacteriota;c__Aminicenantia;o__Aminicenantales;f__UBA8522;g__;s
1.6471	0.963813	1.36079	1.19135	1.03417	0.981167	0.976427	0.900273	0.614423	1.57514	1.51402	d__Bacteria;p__Chloroflexota;c__Dehalococcoidia;o__UBA7967;f__;g__;s
0.551732	1.47824	0.580934	0.316552	2.24725	1.81402	1.86385	1.68167	0.492814	0.826694	0.872214	d__Archaea;p__Crenarchaeota;c__Bathyarchaeia;o__B26-1;f__UBA233;g__;s
0.480803	1.7602	0.819461	0.226017	2.23063	1.56963	1.56878	1.47779	0.406533	1.00799	1.08058	d__Archaea;p__Crenarchaeota;c__Bathyarchaeia;o__B26-1;f__BA1;g__;s
1.42146	0.553233	1.03797	3.58644	0.570289	0.259912	0.268669	0.606149	1.93266	1.01686	0.834519	d__Bacteria;p__Proteobacteria;c__Gammaproteobacteria;o__Competibacterales;f__Competibacteraceae;g__;s
1.80172	1.06382	1.07004	0.87923	1.03004	0.789149	0.750949	0.78366	0.363392	1.36147	1.63618	d__Archaea;p__Crenarchaeota;c__Bathyarchaeia;o__TCS64;f__TCS64;g__RBG-16-57-9;s
0.802302	1.0756	0.858924	0.324573	1.2213	1.34669	1.34565	1.23207	0.349081	1.50615	1.46221	d__Bacteria;p__Planctomycetota;c__Phycisphaerae;o__SG8-4;f__SG8-4;g__RBG-13-46-10;s
1.23935	0.984062	1.2553	1.10969	1.06668	0.815404	0.797452	1.12917	0.821862	1.09812	1.05785	d__Archaea;p__Halobacterota;c__Methanosarcinia;o__Syntrophoarchaeales;f__ANME-1ex4572;g__;s
0.955783	1.03051	1.2071	0.487647	1.43877	1.12791	1.17695	1.12401	0.712563	1.04258	0.986941	d__Archaea;p__Thermoplasmatota;c__E2;o__DHVEG-1;f__DHVEG-1;g__SM1-50;s
0.794997	1.24737	0.627661	0.317383	1.68298	1.45298	1.48294	1.19324	0.41343	0.930407	0.964948	d__Archaea;p__Nanoarchaeota;c__Aenigmarchaeia;o__;f__;g__;s
0.616634	1.18802	0.67567	0.263523	0.569197	0.876139	0.957952	1.09751	2.46158	0.590544	0.49851	d__Bacteria;p__Patescibacteria;c__Microgenomatia;o__Shapirobacterales;f__Um-filter-39-15;g__;s
1.05273	0.8643	0.985266	1.48452	0.370441	0.422863	0.416661	0.516381	0.641058	1.18724	1.32876	d__Bacteria;p__Chloroflexota;c__Anaerolineae;o__;f__;g__;s
0.906245	0.775937	0.977588	0.503106	0.866281	1.03453	1.03758	1.08998	0.219282	0.921067	0.810035	d__Bacteria;p__Omnitrophota;c__koll11;o__UBA6215;f__;g__;s
1.08908	0.574016	0.830259	1.67632	0.658992	0.589853	0.59505	0.692162	0.593298	0.584048	0.851361	d__Bacteria;p__Desulfobacterota;c__Desulfobacteria;o__Desulfatiglanales;f__HGW-15;g__;s
0.965459	0.662345	0.893028	1.11083	0.616082	0.5274	0.527139	0.652868	1.02788	0.85221	0.797643	d__Bacteria;p__Bacteroidota;c__UBA10030;o__UBA10030;f__UBA6906;g__;s
1.12001	1.11686	0.384644	1.21435	0.294275	0.290729	0.298452	0.523695	1.1534	0.91615	0.897276	d__Bacteria;p__Chloroflexota;c__UBA6077;o__;f__;g__;s
0.582007	0.664257	0.663715	0.35842	0.639431	0.932997	0.933793	0.908675	0.344757	0.873076	0.903665	d__Bacteria;p__Margulisbacteria;c__WOR-1;o__O2-12-FULL-45-9;f__XYB2-FULL-48-7;g__;s
0.599173	0.526265	0.542483	1.19354	0.482269	0.593422	0.537443	0.744597	1.15078	0.740727	0.653901	d__Bacteria;p__UBP10;c__GR-WP33-30;o__UTPRO1;f__;g__;s
1.03565	1.01809	1.19905	0.897588	0.389738	0.384892	0.379132	0.461732	0.766187	0.413431	0.541118	d__Archaea;p__Crenarchaeota;c__Bathyarchaeia;o__40CM-2-53-6;f__;g__;s
0.224624	0.623084	0.35746	0.122633	0.749122	1.14797	1.17756	1.44497	0.288197	0.698563	0.631292	d__Bacteria;p__Margulisbacteria;c__WOR-1;o__XYC2-FULL-46-14;f__;g__;s
0.56324	0.866888	0.638257	0.440361	0.475009	0.437767	0.413947	0.590789	0.332545	1.07287	0.802037	d__Bacteria;p__Chloroflexota;c__Anaerolineae;o__Anaerolineales;f__;g__;s
0.737912	0.42765	0.655861	1.29991	0.282747	0.343465	0.312686	0.578917	1.10812	0.463309	0.403188	d__Bacteria;p__Proteobacteria;c__Gammaproteobacteria;o__Steroidobacterales;f__Steroidobacteraceae;g__;s
0.758901	0.442655	0.704327	0.406973	0.545018	0.679513	0.693261	0.580334	0.303374	0.716338	0.695435	d__Archaea;p__Nanoarchaeota;c__;o__;f__;g__;s
0.89392	0.68801	0.7669	0.145696	0.888812	0.752177	0.774325	0.56988	0.128785	0.315681	0.436707	d__Archaea;p__Nanoarchaeota;c__Woesearchaeia;o__SM23-78;f__SM23-78;g__SM23-78;s
1.23721	1.15544	1.13901	1.05551	0.161099	0.122442	0.109811	0.169309	0.738438	0.212599	0.240527	d__Bacteria;p__Actinobacteriota;c__Acidimicrobiia;o__UBA5794;f__UBA11373;g__RBG-16-70-17;s
0.860484	0.446437	0.847171	1.00386	0.51454	0.331928	0.342438	0.279331	0.512212	0.605924	0.586466	d__Bacteria;p__Desulfobacterota;c__BSN033;o__;f__;g__;s
0.962631	0.688989	0.821977	0.325102	0.91174	0.344905	0.344311	0.345339	0.209603	0.656464	0.605409	d__Archaea;p__Thermoplasmatota;c__CG49143;o__;f__;g__;s
0.780964	0.528863	0.732177	0.706197	0.428508	0.355571	0.349437	0.421931	0.394907	0.724114	0.751567	d__Bacteria;p__Chloroflexota;c__Dehalococcoidia;o__UBA2777;f__RBG-13-53-26;g__;s
0.796315	1.42393	1.11423	0.0976708	0.213835	0.380423	0.375743	0.208758	0.11572	0.789799	0.647125	d__Bacteria;p__Chloroflexota;c__Anaerolineae;o__UBA7937;f__;g__;s
0.548369	0.557762	0.682425	0.842715	0.361025	0.245888	0.250811	0.493612	1.07728	0.473687	0.457356	d__Bacteria;p__Chloroflexota;c__Anaerolineae;o__Anaerolineales;f__COMBO-62-14;g__;s
0.456088	0.61499	0.491321	0.246797	0.558635	0.758328	0.746939	0.707943	0.147569	0.65021	0.605438	d__Bacteria;p__Chloroflexota;c__Dehalococcoidia;o__Dehalococcoidales;f__UBA2162;g__;s
0.337412	0.525388	0.429252	0.462947	0.303528	0.416849	0.38884	0.514255	0.728611	1.00905	0.712532	d__Bacteria;p__Myxococcota;c__Myxococcia;o__Myxococcales;f__Anaeromyxobacteraceae;g__;s
0.294985	0.44186	0.328143	0.350099	0.569043	0.659217	0.662653	0.745409	0.441902	0.560778	0.643739	d__Bacteria;p__Proteobacteria;c__Gammaproteobacteria;o__Acidiferrobacterales;f__UBA6901;g__UBA6901;s
0.641919	0.65366	0.491797	0.241195	0.660477	0.597065	0.563988	0.418345	0.098799	0.560048	0.671681	d__Archaea;p__Thermoplasmatota;c__Thermoplasmata_A;o__UBA10834;f__UBA10834;g__;s
0.599866	0.405055	0.540187	0.270284	0.400925	0.399432	0.418438	0.351357	0.257424	0.910808	0.946017	d__Archaea;p__Asgardarchaeota;c__Lokiarchaeia;o__Thorarchaeales;f__Thorarchaeaceae;g__MP8T-1;s
0.0062839	0.0036997	0.0041048	0.0059598	0.0023797	2.69324	2.498	0.004165	0.0398062	0.0339074	0.0545344	d__Bacteria;p__Proteobacteria;c__Gammaproteobacteria;o__Betaproteobacteriales;f__Rhodocyclaceae;g__Dechloromonas;s
0.644158	0.49434	0.775767	0.471331	0.617335	0.320654	0.333235	0.312157	0.393299	0.489787	0.390001	d__Bacteria;p__KSB1;c__UBA2214;o__AABM5-25-91;f__AABM5-25-91;g__AABM5-25-91;s
0.362367	0.351386	0.3744	0.595587	0.411537	0.425834	0.392959	0.589275	0.624875	0.531591	0.470015	d__Bacteria;p__UBP10;c__GR-WP33-30;o__UTPRO1;f__UTPRO1;g__;s
0.623205	0.41773	0.93174	0.402129	0.394104	0.198649	0.203356	0.344331	0.788379	0.434936	0.344389	d__Bacteria;p__Patescibacteria;c__Microgenomatia;o__UBA1400;f__Chisholmbacteraceae;g__2-01-FULL-50-28;s
0.560654	0.451897	0.675985	0.460969	0.464834	0.281562	0.276894	0.283206	0.4348	0.395878	0.497624	d__Archaea;p__Crenarchaeota;c__Bathyarchaeia;o__TCS64;f__TCS64;g__UBA8941;s
0.439861	0.486149	0.538293	0.707975	0.211725	0.216126	0.222119	0.36551	0.513032	0.444898	0.529236	d__Bacteria;p__Chloroflexota;c__Anaerolineae;o__UBA4142;f__;g__;s
0.284871	0.516077	0.337093	0.124896	0.510932	0.581375	0.563445	0.498793	0.11253	0.525511	0.520543	d__Archaea;p__Thermoplasmatota;c__Thermoplasmata_A;o__RBG-16-68-12;f__;g__;s
0.446992	0.338066	0.392692	0.856305	0.210063	0.279901	0.268874	0.375472	0.62316	0.406462	0.364297	d__Bacteria;p__Proteobacteria;c__Gammaproteobacteria;o__Betaproteobacteriales;f__;g__;s
0.378032	0.532192	0.569705	0.15241	0.495419	0.48324	0.455324	0.476859	0.116523	0.412603	0.425313	d__Archaea;p__Hadesarchaeota;c__YNP-45;o__;f__;g__;s
0.162908	0.378666	0.181769	0.27338	0.189695	0.420105	0.447186	0.534213	0.85926	0.545998	0.493537	d__Bacteria;p__Proteobacteria;c__Gammaproteobacteria;o__UBA7966;f__UBA7966;g__;s
0.443283	0.31811	0.611411	0.188841	0.461132	0.563117	0.553691	0.429882	0.133081	0.314131	0.350081	d__Bacteria;p__Omnitrophota;c__koll11;o__GIF10;f__UBA6249;g__;s
0.270555	0.324605	0.267777	0.203518	0.364504	0.557968	0.533052	0.538656	0.242992	0.494361	0.485429	d__Bacteria;p__Chloroflexota;c__Dehalococcoidia;o__GIF9;f__;g__;s
0.483029	0.6182	0.552124	0.144779	0.605689	0.331801	0.303325	0.266957	0.088582	0.424407	0.396823	d__Archaea;p__Thermoplasmatota;c__Thermoplasmata_A;o__;f__;g__;s
0.348446	0.382028	0.494496	0.422411	0.253656	0.262456	0.293673	0.327533	0.254817	0.516241	0.449423	d__Bacteria;p__Chloroflexota;c__Anaerolineae;o__Anaerolineales;f__UBA4823;g__9FT-COMBO-55-16;s
0.40745	0.348579	0.371986	0.24863	0.377217	0.465359	0.465495	0.448926	0.0838079	0.403178	0.321334	d__Archaea;p__Nanoarchaeota;c__UBA10117;o__UBA10117;f__UBA10117;g__;s
0.407406	0.173877	1.76851	1.0706	0.0227807	0.0278326	0.027675	0.0185303	0.121064	0.102318	0.113061	d__Bacteria;p__Desulfuromonadota;c__Desulfuromonadia;o__Geobacterales;f__Geobacteraceae;g__;s
0.447018	0.317241	0.534499	0.407903	0.296952	0.203672	0.196626	0.353868	0.616724	0.198147	0.179365	d__Bacteria;p__Patescibacteria;c__Microgenomatia;o__Curtissbacterales;f__GWA2-41-24;g__GWC1-40-35;s
0.279769	0.255515	0.334012	0.780678	0.154056	0.15829	0.165814	0.244116	0.574381	0.331492	0.371876	d__Bacteria;p__Chloroflexota;c__Anaerolineae;o__CG2-30-64-16;f__CG2-30-64-16;g__;s
0.366787	0.369135	0.381015	0.341629	0.333153	0.281474	0.273552	0.300164	0.311622	0.332635	0.324089	d__Bacteria;p__Methylomirabilota;c__Methylomirabilia;o__;f__;g__;s
0.193929	0.525358	0.181544	0.0703122	0.586577	0.570454	0.550705	0.316803	0.0473614	0.25733	0.296041	d__Bacteria;p__Planctomycetota;c__Phycisphaerae;o__SG8-4;f__SG8-4;g__SG8-4;s						0.318329	0.0594126
0.102641	0.155027	0.113529	0.0597241	0.129231	0.945474	0.909386	0.376703	0.0646879	0.347378	0.300392	d__Archaea;p__Micrarchaeota;c__;o__;f__;g__;s
0.494833	0.281272	0.471802	0.422355	0.233879	0.159483	0.154304	0.192862	0.172893	0.422725	0.398712	d__Bacteria;p__Chloroflexota;c__Dehalococcoidia;o__UBA2777;f__RBG-13-53-26;g__RBG-13-53-26;s
0.372842	0.267664	0.37239	0.464745	0.270892	0.268003	0.259072	0.218657	0.255343	0.254253	0.384123	d__Bacteria;p__Methylomirabilota;c__Methylomirabilia;o__Methylomirabilales;f__2-02-FULL-66-22;g__;s
0.67676	0.249256	0.744702	0.407057	0.241046	0.0667856	0.0654994	0.114805	0.296113	0.232308	0.23176	d__Bacteria;p__Acidobacteriota;c__Aminicenantia;o__Aminicenantales;f__UBA4085;g__RBG-16-66-30;s
0.0812841	0.388756	0.148526	0.0511922	0.373887	0.364782	0.390758	0.527126	0.355597	0.295008	0.267431	d__Bacteria;p__WOR-3;c__WOR-3;o__SM23-42;f__SM23-42;g__;s
0.150025	0.317516	0.397782	0.0896519	0.325902	0.331649	0.333625	0.34076	0.171175	0.354554	0.381873	d__Archaea;p__Asgardarchaeota;c__Lokiarchaeia;o__;f__;g__;s
0.377421	0.221095	0.438166	0.411889	0.124619	0.0931078	0.0891747	0.169161	0.583766	0.297232	0.266937	d__Bacteria;p__Acidobacteriota;c__Thermoanaerobaculia;o__Thermoanaerobaculales;f__;g__;s
0.511906	0.258649	0.423758	0.328112	0.400378	0.165975	0.165675	0.258231	0.119715	0.203143	0.181483	d__Bacteria;p__RBG-13-61-14;c__RBG-13-61-14;o__;f__;g__;s
0.0588208	0.749258	0.0525922	0.0175615	0.444019	0.484204	0.507337	0.372912	0.186432	0.0372583	0.0370066	d__Bacteria;p__Patescibacteria;c__Microgenomatia;o__;f__;g__;s
0.120241	0.436938	0.115802	0.0776696	0.41406	0.339927	0.332254	0.249177	0.488515	0.116762	0.0950929	d__Bacteria;p__Patescibacteria;c__Dojkabacteria;o__B142;f__;g__;s
0.283485	0.221358	0.313504	0.297418	0.265484	0.201414	0.191478	0.254511	0.12695	0.285449	0.272976	d__Archaea;p__Halobacterota;c__Methanomicrobia;o__Methanomicrobiales;f__;g__;s
0.168363	0.324146	0.204692	0.135464	0.230419	0.247447	0.237231	0.333654	0.383974	0.203319	0.236017	d__Archaea;p__Crenarchaeota;c__Bathyarchaeia;o__40CM-2-53-6;f__RBG-16-50-20;g__;s
0.504312	0.2363	0.456182	0.350492	0.284019	0.0802874	0.0773061	0.169967	0.0638279	0.175769	0.152622	d__Bacteria;p__Desulfobacterota;c__Desulfomonilia;o__UBA1062;f__UBA1062;g__;s
0.359803	0.238646	0.496482	0.291454	0.15557	0.0780331	0.0773754	0.190229	0.303387	0.172981	0.161269	d__Bacteria;p__Acidobacteriota;c__1-40CM-2-68-10;o__;f__;g__;s
9.88e-05	0.0006058	0.0001151	0.0003029	0.0002253	1.09559	1.09783	0.0001394	0.0909664	0.0959088	0.113521	d__Bacteria;p__Desulfuromonadota;c__Desulfuromonadia;o__Desulfuromonadales;f__UBA2197;g__UBA2197;s
0.360266	0.20018	0.306182	0.19555	0.257728	0.197603	0.196603	0.253939	0.0565201	0.239405	0.226843	d__Archaea;p__Nanoarchaeota;c__Woesearchaeia;o__UBA119;f__UBA119;g__;s
0.381941	0.124956	0.294461	0.275479	0.129372	0.241754	0.245106	0.249278	0.0644616	0.246316	0.225499	d__Archaea;p__Nanoarchaeota;c__1-14-0-10-43-11;o__1-14-0-10-43-11;f__;g__;s
0.297453	0.220027	0.269401	0.720513	0.054252	0.0945618	0.0921822	0.0947346	0.261697	0.222179	0.140081	d__Bacteria;p__Proteobacteria;c__Gammaproteobacteria;o__Betaproteobacteriales;f__SG8-39;g__;s
0.0044238	0.0061165	0.0096236	0.0038391	0.0024998	0.0555948	0.0530815	0.0014045	1.95915	0.106935	0.249726	d__Bacteria;p__Actinobacteriota;c__Coriobacteriia;o__OPB41;f__ctinobacteria-7;g__;s
0.302313	0.178706	0.267478	0.252662	0.261803	0.235594	0.241195	0.267194	0.223128	0.115241	0.100125	d__Archaea;p__Asgardarchaeota;c__Lokiarchaeia;o__CR-4;f__;g__;s
0.16587	0.101595	0.159919	0.343364	0.205809	0.167118	0.168465	0.25317	0.26518	0.301392	0.273074	d__Bacteria;p__Spirochaetota;c__UBA4802;o__UBA4802;f__UBA5368;g__;s
0.173249	0.181963	0.262969	0.283138	0.203487	0.196389	0.19554	0.206278	0.256623	0.0752077	0.36782	d__Bacteria;p__Desulfobacterota;c__Syntrophobacteria;o__;f__;g__;s
0.0735164	0.0549937	0.0967198	0.462425	0.125754	0.165826	0.187142	0.234543	0.43263	0.275827	0.284864	d__Bacteria;p__Nitrospirota;c__Thermodesulfovibrionia;o__Thermodesulfovibrionales;f__UBA9159;g__;s
0.203033	0.190378	0.244757	0.152372	0.121222	0.209917	0.218382	0.175682	0.533337	0.142852	0.188295	d__Bacteria;p__Patescibacteria;c__Microgenomatia;o__GWA2-44-7;f__Woesebacteraceae;g__;s
0.252448	0.460971	0.20025	0.0859248	0.23767	0.182303	0.169731	0.133147	0.0529526	0.21966	0.376201	d__Bacteria;p__Chloroflexota;c__Anaerolineae;o__Thermoflexales;f__;g__;s
0.231614	0.290213	0.248261	0.0750822	0.0997837	0.140562	0.144255	0.129577	0.650364	0.191797	0.143465	d__Bacteria;p__Patescibacteria;c__Berkelbacteria;o__;f__;g__;s
0.166872	0.166769	0.181343	0.191217	0.162807	0.141509	0.153083	0.21632	0.483837	0.21053	0.234328	d__Archaea;p__Crenarchaeota;c__Bathyarchaeia;o__B26-1;f__UBA233;g__UBA11855;s
0.106497	0.121299	0.109684	0.542882	0.0892053	0.123949	0.128521	0.184104	0.506836	0.203419	0.173123	d__Bacteria;p__Actinobacteriota;c__UBA4738;o__UBA4738;f__9FT-COMBO-70-19;g__9FT-COMBO-70-19;s
0.147871	0.670031	0.304189	0.0964856	0.0511906	0.0860268	0.07898	0.109583	0.318004	0.246463	0.18016	d__Bacteria;p__Chloroflexota;c__Dehalococcoidia;o__SM23-28-2;f__SM23-28-2;g__SM23-28-2;s
0.338495	0.0943027	0.261063	0.547361	0.143633	0.0634506	0.0645122	0.0825913	0.110285	0.377115	0.168735	d__Bacteria;p__Desulfobacterota;c__Syntrophia;o__Syntrophales;f__UBA2185;g__UBA2185;s
0.0006631	0.0006819	0.0005862	0.0014604	0.0011626	1.10596	1.07766	0.0004885	0.0041461	0.0070202	0.0081186	d__Bacteria;p__Firmicutes;c__Bacilli;o__Erysipelotrichales;f__Erysipelotrichaceae;g__UBA2212;s
0.0075797	0.382808	0.0479769	0.0032694	0.464653	0.415177	0.396163	0.289595	0.0200153	0.090246	0.0780631	d__Bacteria;p__Chloroflexota;c__Dehalococcoidia;o__GIF9;f__AB-539-J10;g__;s
0.0758733	0.09674	0.0634731	0.270278	0.11032	0.292837	0.302991	0.277505	0.199276	0.135371	0.339664	d__Archaea;p__Thermoplasmatota;c__Thermoplasmata_A;o__UBA10834;f__;g__;s
0.133584	0.212291	0.215525	0.155963	0.0955109	0.117669	0.113668	0.220512	0.525813	0.159957	0.194579	d__Bacteria;p__Chloroflexota;c__Anaerolineae;o__UBA2200;f__;g__;s
0.271	0.15869	0.312874	0.165097	0.244921	0.201269	0.192262	0.262582	0.14618	0.0814614	0.0674979	d__Bacteria;p__Patescibacteria;c__ABY1;o__GCA-002771165;f__;g__;s
0.349505	0.190097	0.560217	0.216647	0.137897	0.0663103	0.0605249	0.108047	0.119878	0.139496	0.138088	d__Bacteria;p__Bipolaricaulota;c__Bipolaricaulia;o__UBA7950;f__UBA7950;g__;s
0.281762	0.184003	0.359448	0.0973107	0.224671	0.089633	0.0995626	0.0977439	0.0726698	0.252711	0.319531	d__Bacteria;p__Chloroflexota;c__Dehalococcoidia;o__Dehalococcoidales;f__UBA3254;g__;s
0.872453	0.23252	0.526509	0.237848	0.0346699	0.0083102	0.008939	0.017811	0.0520144	0.0346886	0.0359697	d__Bacteria;p__Actinobacteriota;c__RBG-13-55-18;o__RBG-13-55-18;f__RBG-13-55-18;g__;s
0.235006	0.166459	0.278941	0.160576	0.225038	0.160227	0.152196	0.18932	0.0965046	0.169274	0.203657	d__Bacteria;p__Verrucomicrobiota;c__Verrucomicrobiae;o__Pedosphaerales;f__Pedosphaeraceae;g__;s
0.156335	0.138993	0.200622	0.18785	0.181111	0.136266	0.133742	0.261849	0.329066	0.115681	0.160234	d__Archaea;p__Crenarchaeota;c__Nitrososphaeria;o__;f__;g__;s
0.147098	0.100831	0.114072	0.660748	0.0909899	0.108879	0.101399	0.110427	0.210119	0.186067	0.170209	d__Bacteria;p__Actinobacteriota;c__Thermoleophilia;o__UBA2241;f__UBA2241;g__UBA2241;s
0.21343	0.17972	0.209005	0.38348	0.0879718	0.11667	0.114844	0.127585	0.226791	0.175769	0.162918	d__Archaea;p__Halobacterota;c__Methanosarcinia;o__UBA590;f__UBA590;g__UBA590;s
0.16926	0.159163	0.215583	0.222034	0.161953	0.152982	0.15135	0.174872	0.203163	0.112645	0.268149	d__Archaea;p__Thermoplasmatota;c__Thermoplasmata_A;o__Methanomassiliicoccales;f__;g__;s
0.159408	0.341443	0.107862	0.0940359	0.10005	0.196395	0.174597	0.213885	0.0999891	0.272683	0.226426	d__Bacteria;p__Armatimonadota;c__UBA10988;o__;f__;g__;s
0.14	0.126628	0.111347	0.196366	0.154391	0.149948	0.157861	0.216136	0.30901	0.254998	0.169746	d__Bacteria;p__Desulfobacterota;c__BSN033;o__BSN033;f__RBG-16-54-18;g__RBG-13-52-11;s
0.144235	0.146002	0.28779	0.121446	0.222724	0.212447	0.214644	0.325997	0.143781	0.0757898	0.068943	d__Bacteria;p__Patescibacteria;c__Paceibacteria;o__Paceibacterales;f__DG-74-1;g__DG-74-1;s
0.223132	0.168334	0.283642	0.184137	0.110256	0.0701948	0.0712518	0.0960848	0.305644	0.224233	0.221241	d__Bacteria;p__Acidobacteriota;c__UBA6911;o__UBA6911;f__UBA6911;g__;s
0.322424	0.189831	0.233032	0.214895	0.187182	0.0881752	0.0947409	0.101905	0.119929	0.216873	0.176053	d__Archaea;p__Thermoplasmatota;c__Thermoplasmata_A;o__Methanomassiliicoccales;f__UBA472;g__;s
0.139269	0.103512	0.122559	0.565957	0.0752746	0.111213	0.115057	0.120137	0.253576	0.174444	0.161463	d__Bacteria;p__Proteobacteria;c__Gammaproteobacteria;o__Betaproteobacteriales;f__SG8-40;g__;s
0.719142	0.332905	0.375224	0.0714369	0.139345	0.0591225	0.0531133	0.0966515	0.0395487	0.0083849	0.0351035	d__Bacteria;p__Myxococcota;c__Polyangia;o__Polyangiales;f__;g__;s
0.164403	0.137724	0.109223	0.137192	0.120423	0.239882	0.247211	0.296142	0.105543	0.149491	0.157908	d__Bacteria;p__Patescibacteria;c__Gracilibacteria;o__um-filter-43-11;f__um-filter-43-11;g__;s
0.177553	0.163095	0.223334	0.169051	0.207282	0.135933	0.144449	0.192617	0.216016	0.0791929	0.133085	d__Bacteria;p__Desulfobacterota;c__BSN033;o__SM23-61;f__SM23-61;g__SM23-61;s
0.200006	0.12449	0.13443	0.145439	0.122376	0.0911042	0.0957926	0.192403	0.388335	0.183437	0.158262	d__Archaea;p__Thermoplasmatota;c__E2;o__DHVEG-1;f__UBA202;g__UBA202;s
0.241431	0.116398	0.192135	0.340591	0.122785	0.101058	0.104593	0.13116	0.176847	0.0969402	0.185903	d__Bacteria;p__Desulfobacterota;c__Desulfobacteria;o__;f__;g__;s
0.174775	0.149916	0.13954	0.137389	0.188685	0.195592	0.195757	0.229133	0.141339	0.119949	0.122151	d__Bacteria;p__Entotheonellota;c__Entotheonellia;o__;f__;g__;s
0.087864	0.123493	0.113277	0.19748	0.0817422	0.135483	0.133947	0.175729	0.356707	0.189175	0.177449	d__Bacteria;p__Actinobacteriota;c__Coriobacteriia;o__OPB41;f__UBA2279;g__;s
0.0467398	0.167245	0.0443896	0.0196958	0.293346	0.348543	0.351132	0.314921	0.0679463	0.05259	0.0556819	d__Bacteria;p__Patescibacteria;c__Paceibacteria;o__Paceibacterales;f__;g__;s
0.169266	0.106909	0.195718	0.186984	0.111849	0.125261	0.11001	0.133736	0.25718	0.18627	0.173773	d__Bacteria;p__Proteobacteria;c__Gammaproteobacteria;o__Betaproteobacteriales;f__SG8-39;g__2-12-FULL-64-23;s
0.0018335	0.0013897	0.0009562	0.0031871	0.0012953	0.622172	0.600164	0.0011347	0.0006581	0.310896	0.197012	d__Bacteria;p__Proteobacteria;c__Gammaproteobacteria;o__Betaproteobacteriales;f__Methylophilaceae;g__Methylotenera;s
0.132766	0.112917	0.145322	0.0740988	0.107165	0.209651	0.21085	0.234772	0.0278579	0.230959	0.223471	d__Archaea;p__Nanoarchaeota;c__Woesearchaeia;o__ARS49;f__GCA-2687275;g__;s
0.16466	0.274542	0.136117	0.0320181	0.217409	0.157363	0.149283	0.117274	0.074084	0.198628	0.147911	d__Bacteria;p__Firmicutes_E;c__DTU015;o__UBA9673;f__;g__;s
0.113715	0.327358	0.132749	0.125024	0.079808	0.124097	0.117239	0.196531	0.276701	0.0867825	0.0860919	d__Bacteria;p__Actinobacteriota;c__Acidimicrobiia;o__IMCC26256;f__IMCC26256;g__;s
0.0871501	0.0629185	0.0509536	0.36059	0.0505689	0.086645	0.088581	0.111521	0.339267	0.225546	0.199585	d__Bacteria;p__Proteobacteria;c__Gammaproteobacteria;o__Methylococcales;f__Methylococcaceae;g__Methyloterricola;s
0.0876053	0.139177	0.114346	0.0412227	0.104932	0.200139	0.197871	0.145596	0.312131	0.0456229	0.272584	d__Bacteria;p__Patescibacteria;c__WWE3;o__UBA101185;f__UBA10185;g__UBA1401;s
0.0825249	0.271144	0.0725241	0.0507643	0.331957	0.162393	0.157647	0.175081	0.123193	0.119697	0.11072	d__Archaea;p__Crenarchaeota;c__Methanomethylicia;o__Methanomethyliales;f__Methanomethyliaceae;g__;s
0.0778405	0.087154	0.0541994	0.0669185	0.0984715	0.313818	0.317246	0.253345	0.125282	0.117738	0.130397	d__Bacteria;p__Patescibacteria;c__Paceibacteria;o__Paceibacterales;f__CG1-02-41-26;g__CG1-02-37-13;s
0.118072	0.181495	0.153629	0.0760651	0.140647	0.141274	0.149246	0.149375	0.32754	0.0938797	0.1046	d__Bacteria;p__Patescibacteria;c__Microgenomatia;o__GWA2-44-7;f__Woesebacteraceae;g__WO2-FULL-39-9;s
0.211146	0.12329	0.108147	0.0745958	0.150383	0.092471	0.0904114	0.0821039	0.0638455	0.338239	0.279392	d__Bacteria;p__Bacteroidota;c__UBA10030;o__UBA10030;f__UBA10030;g__;s
0.182363	0.143715	0.196071	0.137561	0.160881	0.131407	0.122613	0.156718	0.0879734	0.131535	0.155518	d__Bacteria;p__Verrucomicrobiota;c__Verrucomicrobiae;o__Pedosphaerales;f__UBA9464;g__;s
0.160697	0.228608	0.164268	0.125377	0.0845728	0.0983556	0.10403	0.134644	0.204525	0.114197	0.182223	d__Archaea;p__Crenarchaeota;c__Bathyarchaeia;o__40CM-2-53-6;f__RBG-13-38-9;g__;s
0.18613	0.32297	0.297473	0.0431448	0.159684	0.0408575	0.0414837	0.0457059	0.218197	0.0738791	0.160919	d__Bacteria;p__Caldisericota;c__Caldisericia;o__;f__;g__;s
0.185412	0.131645	0.159852	0.167248	0.106956	0.106289	0.107212	0.138678	0.181593	0.160083	0.140499	d__Bacteria;p__UBP1;c__PRR-12;o__;f__;g__;s
0.227806	0.153606	0.314408	0.157392	0.105306	0.0774115	0.0762532	0.114862	0.0899369	0.140009	0.123122	d__Bacteria;p__Edwardsbacteria;c__;o__;f__;g__;s
0.292455	0.137849	0.218735	0.204035	0.145995	0.0723081	0.0710815	0.0912256	0.064136	0.132601	0.126865	d__Bacteria;p__Desulfobacterota;c__Desulfomonilia;o__UBA1062;f__;g__;s
0.0321715	0.0781782	0.0164173	0.0199199	0.0730304	0.415935	0.407643	0.309722	0.0820854	0.0690116	0.0451815	d__Bacteria;p__Patescibacteria;c__Paceibacteria;o__Paceibacterales;f__DG-74-1;g__;s
0.177712	0.0898095	0.131958	0.117787	0.114709	0.187521	0.18899	0.170249	0.0423812	0.156918	0.151309	d__Archaea;p__Nanoarchaeota;c__Woesearchaeia;o__;f__;g__;s
0.0818542	0.120742	0.0851077	0.0711424	0.206871	0.164262	0.179159	0.19987	0.102427	0.144728	0.136336	d__Bacteria;p__Calditrichota;c__Calditrichia;o__RBG-13-44-9;f__RBG-13-44-9;g__RBG-13-44-9;s
0.188211	0.113479	0.189014	0.180166	0.113099	0.0746628	0.0741394	0.100434	0.139146	0.165058	0.15382	d__Bacteria;p__Bacteroidota;c__UBA10030;o__UBA10030;f__;g__;s
0.208653	0.109906	0.213071	0.132042	0.159189	0.13876	0.137423	0.194821	0.100384	0.0461715	0.0482989	d__Bacteria;p__Patescibacteria;c__ABY1;o__Buchananbacterales;f__;g__;s
0.08037	0.0687452	0.0764485	0.142467	0.078059	0.0994848	0.0989992	0.172111	0.38395	0.140771	0.132846	d__Bacteria;p__Proteobacteria;c__Gammaproteobacteria;o__Betaproteobacteriales;f__Burkholderiaceae;g__;s
0.133339	0.17047	0.0838706	0.0418629	0.219578	0.256266	0.251776	0.15934	0.0206152	0.064459	0.0698982	d__Archaea;p__Micrarchaeota;c__Micrarchaeia;o__Micrarchaeales;f__;g__;s
0.0876841	0.0788031	0.0924379	0.0773321	0.122151	0.111994	0.108831	0.180644	0.343047	0.136664	0.125837	d__Archaea;p__Thermoplasmatota;c__E2;o__DHVEG-1;f__JdFR-43;g__;s
0.0423517	0.167271	0.0575457	0.0253474	0.17187	0.238445	0.237145	0.215164	0.0299804	0.138939	0.138952	d__Archaea;p__Micrarchaeota;c__Micrarchaeia;o__UBA10214;f__UBA10214;g__;s
0.210282	0.176866	0.0218739	0.0176067	0.120996	0.0149246	0.0159054	0.0114562	0.131138	0.233103	0.49527	d__Bacteria;p__Verrucomicrobiota;c__Kiritimatiellae;o__UBA8416;f__;g__;s
0.19407	0.151033	0.174319	0.197271	0.0765222	0.0736324	0.0665665	0.103646	0.183373	0.112371	0.115167	d__Bacteria;p__Gemmatimonadota;c__Gemmatimonadetes;o__;f__;g__;s
0.191744	0.127502	0.112991	0.161386	0.0764491	0.0751385	0.0769497	0.0824153	0.175085	0.171636	0.191794	d__Bacteria;p__KSB1;c__UBA2214;o__UBA2214;f__UBA2214;g__;s
0.188797	0.0766734	0.132799	0.18496	0.0959652	0.125176	0.112102	0.135572	0.202727	0.0747197	0.0773541	d__Bacteria;p__Patescibacteria;c__Paceibacteria;o__Paceibacterales;f__Nealsonbacteraceae;g__;s
0.179165	0.0837555	0.169409	0.244429	0.0812908	0.0579508	0.060888	0.0832362	0.161216	0.126771	0.128728	d__Bacteria;p__Eremiobacterota;c__;o__;f__;g__;s
0.0396982	0.216451	0.102201	0.0094843	0.109907	0.164642	0.151706	0.166458	0.013142	0.135373	0.255748	d__Bacteria;p__Chloroflexota;c__Anaerolineae;o__Anaerolineales;f__envOPS12;g__;s
0.0621211	0.217526	0.05953	0.0297624	0.224919	0.195542	0.172426	0.132339	0.0188965	0.115926	0.133499	d__Archaea;p__Thermoplasmatota;c__Thermoplasmata_A;o__UBA10834;f__UBA10834;g__RBG-16-62-10;s
0.271649	0.116979	0.244583	0.163028	0.0997098	0.0439144	0.0450862	0.0447924	0.0800422	0.104132	0.126508	d__Bacteria;p__Bacteroidota;c__Bacteroidia;o__Bacteroidales;f__;g__;s
0.113178	0.104996	0.123493	0.157181	0.108907	0.0991414	0.0989884	0.109733	0.153425	0.138917	0.129799	d__Bacteria;p__Spirochaetota;c__;o__;f__;g__;s
0.154298	0.100906	0.11454	0.107237	0.130898	0.155418	0.160289	0.16769	0.10592	0.0700109	0.0609611	d__Archaea;p__Thermoplasmatota;c__E2;o__DHVEG-1;f__;g__;s
0.138471	0.0974727	0.146005	0.146783	0.150627	0.0984539	0.104309	0.127043	0.140018	0.0683681	0.0925346	d__Bacteria;p__Desulfobacterota;c__BSN033;o__SM23-61;f__SM23-61;g__;s
0.151219	0.108585	0.195003	0.0725836	0.101575	0.0709022	0.0687232	0.0857691	0.0531062	0.202664	0.194727	d__Archaea;p__Asgardarchaeota;c__Lokiarchaeia;o__Thorarchaeales;f__Thorarchaeaceae;g__;s
0.104455	0.0831271	0.112001	0.107557	0.100291	0.103334	0.108789	0.126192	0.112226	0.14895	0.150501	d__Bacteria;p__Chloroflexota;c__Dehalococcoidia;o__GIF9;f__UBA5620;g__;s
0.100813	0.0777103	0.104182	0.127341	0.125916	0.110755	0.116767	0.133352	0.127564	0.110891	0.107971	d__Bacteria;p__Desulfobacterota;c__BSN033;o__BSN033;f__;g__;s
0.142463	0.109213	0.122415	0.105614	0.100261	0.0940709	0.0933573	0.0958139	0.0889521	0.139876	0.145359	d__Bacteria;p__OLB16;c__;o__;f__;g__;s
0.0013881	0.0015172	0.0004939	0.0012253	0.002192	0.60528	0.601554	0.0020367	0.0007854	0.0008601	0.0005037	d__Bacteria;p__Bacteroidota;c__Bacteroidia;o__Bacteroidales;f__Paludibacteraceae;g__Paludibacter;s
0.206252	0.403181	0.0939875	0.0126915	0.2222	0.0090961	0.0091932	0.0068671	0.0665094	0.0439905	0.139889	d__Bacteria;p__Verrucomicrobiota;c__Kiritimatiellae;o__UBA8416;f__YA12-FULL-60-10;g__;s
0.207276	0.180056	0.117263	0.0478162	0.213887	0.075347	0.0741545	0.0738152	0.0327701	0.109958	0.0675343	d__Bacteria;p__RBG-13-61-14;c__RBG-13-61-14;o__RBG-13-61-14;f__;g__;s
0.0838959	0.0847391	0.112538	0.057192	0.0851789	0.153302	0.154148	0.150652	0.0239401	0.15132	0.142583	d__Archaea;p__Nanoarchaeota;c__Woesearchaeia;o__ARS49;f__;g__;s
0.0797154	0.0937249	0.0799804	0.0697712	0.116183	0.143515	0.147222	0.136769	0.0761489	0.119971	0.121452	d__Bacteria;p__Chloroflexota;c__Dehalococcoidia;o__Dehalococcoidales;f__;g__;s
0.0762873	0.14312	0.0846322	0.0397389	0.213417	0.137605	0.139413	0.100612	0.0557201	0.0944655	0.0793206	d__Bacteria;p__Gemmatimonadota;c__Glassbacteria;o__GWA2-58-10;f__GWA2-58-10;g__;s
0.0954918	0.0859591	0.0880006	0.0639187	0.112981	0.15586	0.159372	0.148594	0.0696225	0.0895188	0.0822279	d__Bacteria;p__Patescibacteria;c__;o__;f__;g__;s
0.115367	0.0876058	0.110887	0.0958846	0.0940114	0.0896336	0.0910188	0.0916921	0.105423	0.125928	0.138459	d__Bacteria;p__UBP6;c__;o__;f__;g__;s
0.0889333	0.0961896	0.0951889	0.107139	0.095603	0.0861846	0.0903592	0.10472	0.14356	0.114065	0.115542	d__Bacteria;p__Chloroflexota;c__Anaerolineae;o__Anaerolineales;f__COMBO-62-14;g__RBG-16-48-8;s
0.0993019	0.0692107	0.0940642	0.123519	0.114092	0.0969738	0.101791	0.113887	0.112315	0.102501	0.108512	d__Bacteria;p__Desulfobacterota;c__BSN033;o__BSN033;f__UBA1163;g__RBG-16-49-23;s
0.109661	0.0752024	0.120253	0.170681	0.0745801	0.0604849	0.0651512	0.0869434	0.163729	0.0925133	0.0951748	d__Bacteria;p__Chloroflexota;c__Anaerolineae;o__Anaerolineales;f__Anaerolineaceae;g__;s
0.0008315	0.0004877	0.0003635	0.0016738	0.0003752	0.435314	0.421937	0.0049797	0.0006526	0.119514	0.0864543	d__Bacteria;p__Proteobacteria;c__Gammaproteobacteria;o__Pseudomonadales;f__Moraxellaceae;g__Acinetobacter;s
0.0008569	0.0004169	0.0007528	0.0016937	0.0001708	0.542408	0.492993	0.0016274	0.0047009	0.0106627	0.0064802	d__Bacteria;p__Proteobacteria;c__Gammaproteobacteria;o__Betaproteobacteriales;f__Burkholderiaceae;g__Aquabacterium;s
0.0726567	0.116899	0.014293	0.0765269	0.129945	0.232708	0.223788	0.0840329	0.0107416	0.0142054	0.0088592	d__Archaea;p__Nanoarchaeota;c__Aenigmarchaeia;o__CG10238-14;f__;g__;s
0.0008192	0.000167	0.0004298	0.0011308	0.000621	0.478792	0.446744	0.0007493	0.001003	0.0056905	0.005952	d__Bacteria;p__Proteobacteria;c__Gammaproteobacteria;o__Pseudomonadales;f__Pseudomonadaceae;g__Pseudomonas_A;s
0.0562074	0.0797806	0.0426764	0.0403223	0.129637	0.192458	0.176449	0.116121	0.0365677	0.0146777	0.0180033	d__Archaea;p__Nanoarchaeota;c__Woesearchaeia;o__Pacearchaeales;f__;g__;s
0.0007768	0.0008248	0.0007641	0.0011727	0.0006133	0.459594	0.427658	0.0009251	0.0018861	0.0024088	0.0032728	d__Bacteria;p__Proteobacteria;c__Alphaproteobacteria;o__Azospirillales;f__Azospirillaceae;g__Azospirillum;s
0.0134695	0.12439	0.0167622	0.0100931	0.163177	0.177502	0.174557	0.119336	0.0115166	0.0403797	0.0463938	d__Bacteria;p__Chloroflexota;c__Dehalococcoidia;o__GIF9;f__AB-539-J10;g__CG2-30-46-19;s
0.0010198	0.0010587	0.0004458	0.0010264	0.000671	0.296687	0.277473	0.0010796	0.0087042	0.0078084	0.0067898	d__Bacteria;p__Proteobacteria;c__Gammaproteobacteria;o__Betaproteobacteriales;f__Burkholderiaceae;g__Acidovorax;s
0.0005316	0.0003438	0.0002412	0.0009717	0.0002075	0.0341664	0.0303734	0.0002656	0.001676	0.0923366	0.133124	d__Bacteria;p__Proteobacteria;c__Gammaproteobacteria;o__Methylococcales;f__Methylomonadaceae;g__Methylomonas;s
0.0007084	0.0062323	0.0006636	0.0013969	0.0027169	0.0042912	0.0027487	0.0009642	0.0226369	0.0036265	0.0952268	d__Bacteria;p__Campylobacterota;c__Campylobacteria;o__Campylobacterales;f__Thiovulaceae;g__Sulfuricurvum;s
0.0009625	0.0004558	0.000458	0.0015725	0.0002825	0.0156998	0.0150677	0.0003895	0.0007621	0.008593	0.0057896	d__Bacteria;p__Proteobacteria;c__Gammaproteobacteria;o__Methylococcales;f__Methylomonadaceae;g__Methylobacter_A;s
0.0013677	0.0013146	0.0011486	0.0010143	0.0020082	0.0201585	0.0169698	0.0004115	0.0005791	0.0002315	0.000629	d__Bacteria;p__Elusimicrobiota;c__Elusimicrobia;o__Elusimicrobiales;f__UBA9959;g__UBA9959;s
0.0006949	0.0004427	0.0007404	0.0034468	0.0004115	0.0024914	0.0017383	0.0014344	0.0016361	0.0001197	0.0017891	d__Bacteria;p__Firmicutes;c__Bacilli;o__Bacillales_A;f__Planococcaceae;g__;s
